# Supplementary material
Source: PubMed Central journal article supplement (PMC3513654)
Supplement: NIHMS413839-supplement-02.pdf [file NIHMS413839-supplement-02.pdf]

|                    | WT                |                        |          |             |          |                    |          |             |          |  |
|--------------------|-------------------|------------------------|----------|-------------|----------|--------------------|----------|-------------|----------|--|
|                    | No fracture       | Non-stablized fracture |          |             |          | Stablized fracture |          |             |          |  |
|                    | Bone marrow<br>d0 | Bone marrow            |          | Soft tissue |          | Bone marrow        |          | Soft tissue |          |  |
|                    |                   | d2                     | d5       | d2          | d5       | d2                 | d5       | d2          | d5       |  |
| <b>Macrophage</b>  | 16.3±1.21         | 18.0±0.91              | 19.6±1.9 | 13.2±1.81,2 | 16.0±2.1 | 20.0±0.81          | 22.8±1.6 | 18.1±4.91,2 | 22.0±2.1 |  |
| <b>Neutrophil</b>  | 52.0±2.1          | 61.5±2.1               | 52.3±2.2 | 54.7±9.8    | 43.7±8.7 | 58.4±3.0           | 49.9±2.3 | 50.5±4.91   | 43.0±4.2 |  |
| <b>Mast cell</b>   | 5.0±1.7           | 4.8±2.7                | 3.9±1.4  | 4.1±3.9     | 2.9±1.6  | 3.6±1.9            | 2.5±1.8  | 4.1±3.0     | 3.5±1.1  |  |
| <b>B cell</b>      | 2.3±1.5           | 3.3±1.7                | 3.2±1.5  | 5.3±2.4     | 2.9±2.1  | 4.0±1.0            | 4.5±2.8  | 4.7±2.2     | 3.1±2.4  |  |
| <b>CD4+ T cell</b> | 2.0±1.01          | 3.6±1.41               | 4.8±1.7  | 4.1±2.21,2  | 5.4±2.2  | 2.6±1.71           | 3.8±1.5  | 12.7±5.42   | 12.5±3.2 |  |

|                    | KO                |                        |          |             |          |                    |          |             |           |  |
|--------------------|-------------------|------------------------|----------|-------------|----------|--------------------|----------|-------------|-----------|--|
|                    | No fracture       | Non-stablized fracture |          |             |          | Stablized fracture |          |             |           |  |
|                    | Bone marrow<br>d0 | Bone marrow            |          | Soft tissue |          | Bone marrow        |          | Soft tissue |           |  |
|                    |                   | d2                     | d5       | d2          | d5       | d2                 | d5       | d2          | d5        |  |
| <b>Macrophage</b>  | 19.6±1.01         | 22.4±1.81              | 23.4±2.2 | 23.1±2.21,2 | 21.3±1.8 | 24.4±2.11          | 25.3±0.7 | 27.8±3.91,2 | 26.2±3.1  |  |
| <b>Neutrophil</b>  | 48.7±6.9          | 63.7±6.9               | 53.5±7.7 | 50.8±10.02  | 41.1±9.7 | 57.2±8.0           | 50.2±8.6 | 67.3±7.21,2 | 46.7±12.3 |  |
| <b>Mast cell</b>   | 4.5±2.0           | 4.3±2.5                | 3.3±2.0  | 5.4±5.1     | 6.4±2.4  | 5.6±3.5            | 3.4±2.9  | 5.9±3.8     | 4.9±3.1   |  |
| <b>B cell</b>      | 2.0±1.8           | 2.8±1.6                | 3.2±1.6  | 4.6±2.0     | 5.6±2.6  | 3.4±2.1            | 6.6±2.8  | 5.8±2.8     | 3.6±1.9   |  |
| <b>CD4+ T cell</b> | 3.5±1.11          | 6.0±1.01               | 7.2±1.3  | 7.4±2.11,2  | 9.0±1.7  | 7.0±1.91           | 6.9±1.5  | 11.4±4.62   | 14.9±3.0  |  |
